# Supplementary material for: Using High-Throughput Phenotyping to Explore Growth Responses to Mycorrhizal Fungi and Zinc in Three Plant Species
Source: PubMed Central journal article supplement (PMC7718633; doi:10.34133/2019/5893953), 2019-03-25

*Hordeum vulgare*

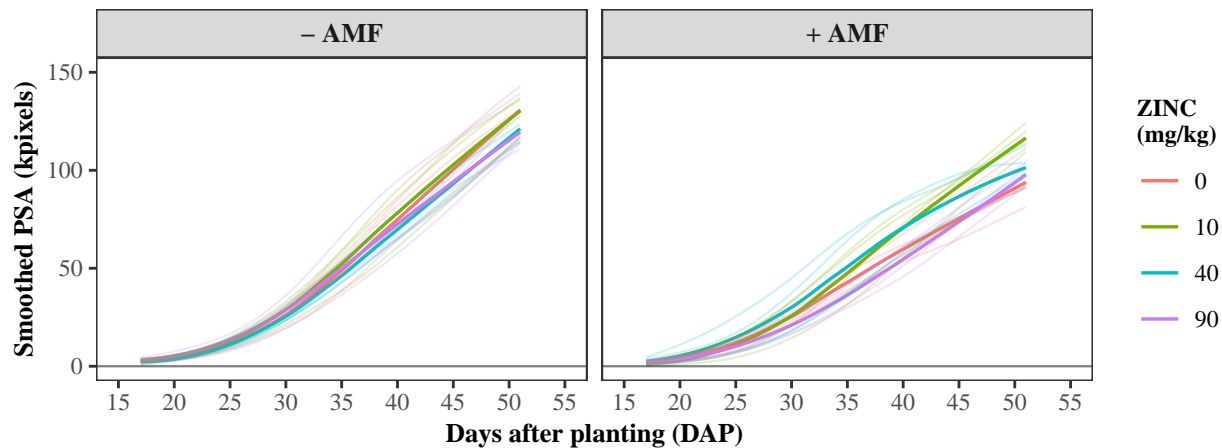

*Solanum lycopersicum*

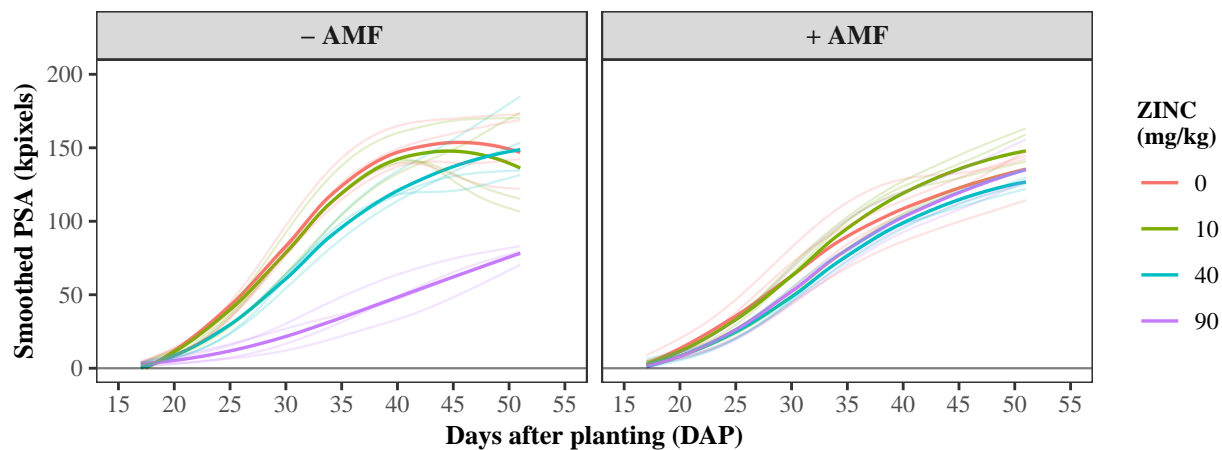

*Medicago truncatula*

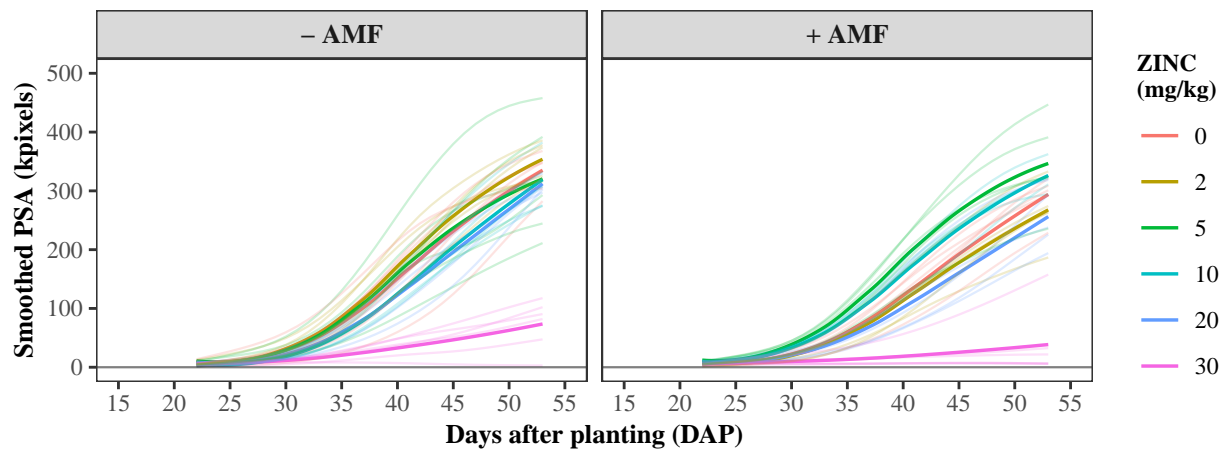

Supplement: 5893953.f2.pdf [file 5893953.f2.pdf]
